# Supplementary material for: Metabolomics strategy reveals the osteogenic mechanism of yak (Bos grunniens) bone collagen peptides on ovariectomy-induced osteoporosis in rats
Source: Royal Society of Chemistry journal article supplement (doi:10.1039/c9fo01944h), 2020-01-01
Supplement: c9fo01944h1.pdf [file c9fo01944h1.pdf]

## Supplementary Material

**Table S1** UPLC/Q-TOF MS mobile phase gradient elution procedure for the analysis of serum.

| <b>Time (min)</b> | <b>Mobile phase A (%)</b> | <b>Mobile phase B (%)</b> |
|-------------------|---------------------------|---------------------------|
| 0~0.5             | 5                         | 95                        |
| 0.5~7             | 5~35                      | 65~95                     |
| 7~8               | 35~60                     | 40~65                     |
| 8~9               | 60                        | 40                        |
| 9~9.1             | 60~5                      | 40~95                     |
| 9.1~12            | 5                         | 95                        |

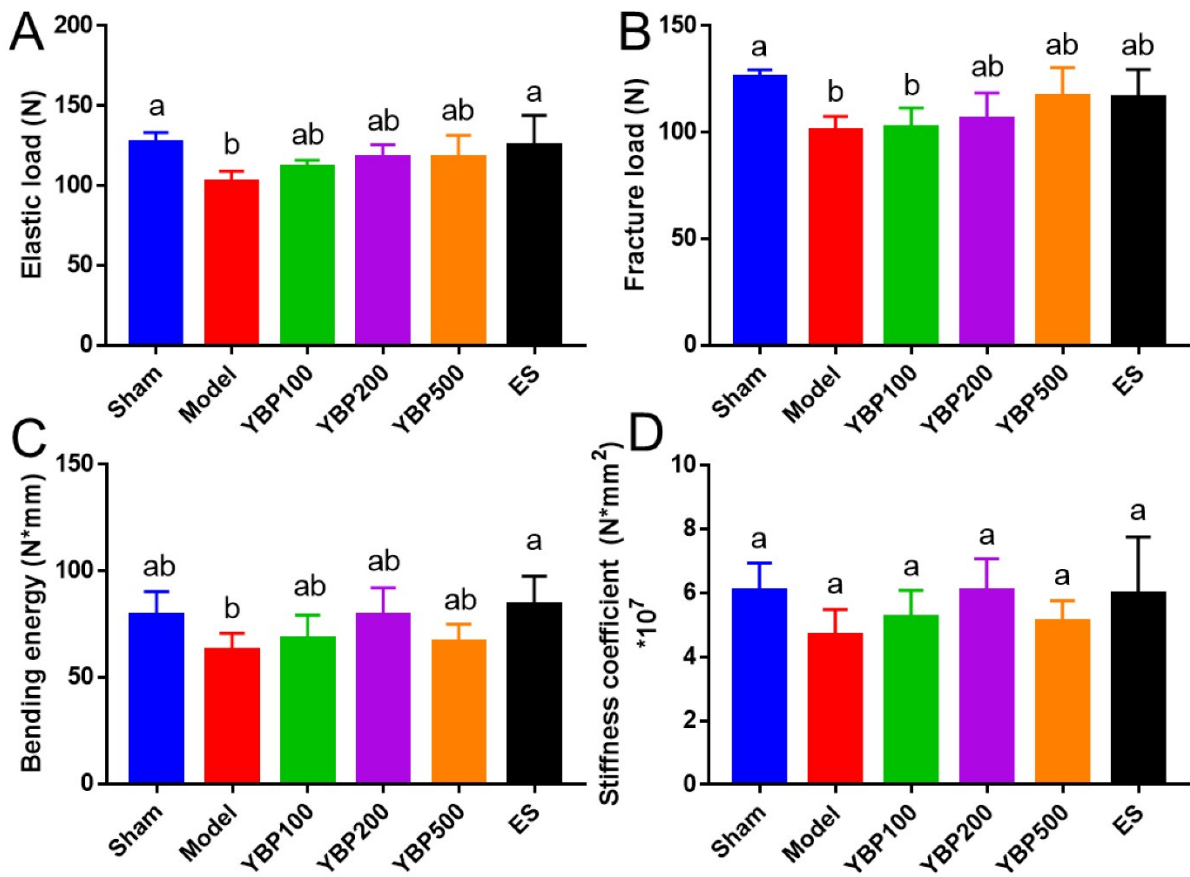

Fig. S1 Bone biomechanical parameters measured by three-point bending test

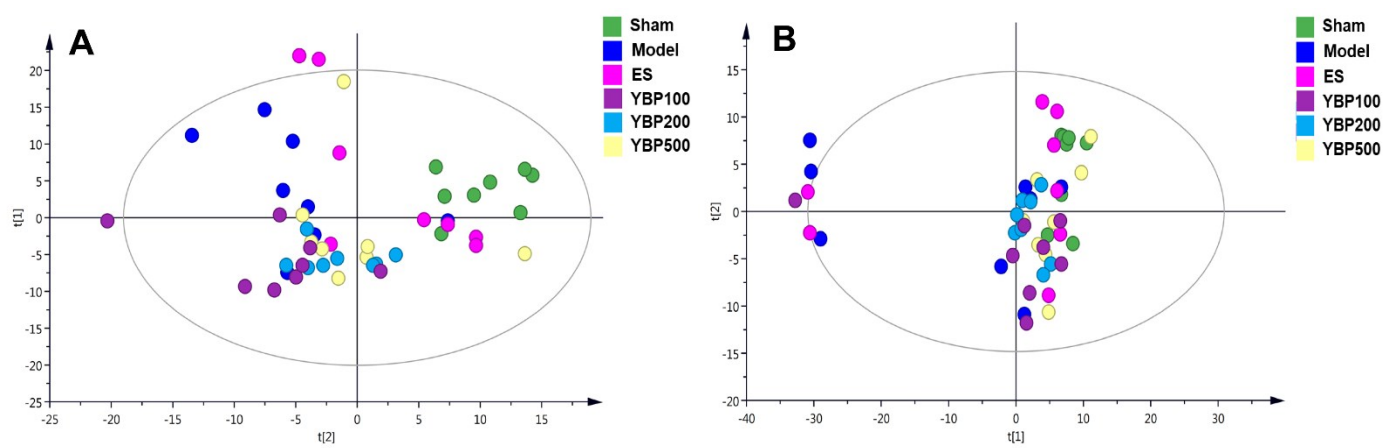

**Fig. S2** Metabolite profiling analysis of ovariectomized rats (PCA scores plots, positive mode: A; negative mode: B).

**Table S2** Metabolites with significant differences between Sham and Model groups

| <b>No.</b> | <b>Adduct</b>            | <b>Description</b>       | <b>m/z</b> | <b>p-value</b> | <b>VIP</b> | <b>Fold change</b> |
|------------|--------------------------|--------------------------|------------|----------------|------------|--------------------|
| 1          | (M-H)-                   | DL-lactate               | 89.0245    | 0.00813        | 3.5595     | 1.26               |
| 2          | (M-H)-                   | Creatinine               | 112.0511   | 0.03110        | 1.3381     | 0.62               |
| 3          | (M-H)-                   | Indole                   | 116.0501   | 0.00776        | 1.2160     | 2.27               |
| 4          | (M-H)-                   | L-Threonine              | 118.0510   | 0.00503        | 1.3004     | 1.60               |
| 5          | (M+H)+                   | Betaine                  | 118.0846   | 0.02031        | 21.1039    | 0.87               |
| 6          | (M-H)-                   | L-Isoleucine             | 130.0881   | 0.01228        | 1.9882     | 1.25               |
| 7          | (M+CH <sub>3</sub> COO)- | Pyruvaldehyde            | 131.0343   | 0.04201        | 1.1723     | 0.70               |
| 8          | (M-H)-                   | L-Lysine                 | 145.0975   | 0.00122        | 1.1470     | 1.47               |
| 9          | (M+NH <sub>4</sub> )+    | L-Pyroglutamic acid      | 147.0739   | 0.00998        | 1.6205     | 0.87               |
| 10         | (M-H)-                   | Vanillin                 | 151.0396   | 0.00079        | 1.0624     | 2.50               |
| 11         | (M-H <sub>2</sub> O-H)-  | D-Tagatose               | 161.0452   | 0.02127        | 2.7768     | 0.73               |
| 12         | (M-H)-                   | Uric acid                | 167.0212   | 0.04694        | 3.8404     | 0.57               |
| 13         | (M+H)+                   | 4-Pyridoxic acid         | 184.0583   | 0.02877        | 1.2893     | 0.66               |
| 14         | (M+H)+                   | Phosphorylcholine        | 184.0710   | 0.00000        | 1.6688     | 1.67               |
| 15         | (M-H)-                   | Indoleacrylic acid       | 186.0562   | 0.00244        | 2.1236     | 2.85               |
| 16         | (M+H-H <sub>2</sub> O)+  | DL-Indole-3-lactic acid  | 188.0690   | 0.00365        | 3.8271     | 1.27               |
| 17         | (M-H)-                   | 3-Indolepropionic acid   | 188.0720   | 0.00808        | 7.6162     | 2.30               |
| 18         | (M-H <sub>2</sub> O-H)-  | 3-Hydroxydodecanoic acid | 197.1540   | 0.02615        | 2.1393     | 0.40               |
| 19         | (M-H)-                   | L-Tryptophan             | 203.0837   | 0.00099        | 5.1567     | 1.71               |
| 20         | (M+H)+                   | Ile-Ala                  | 203.1371   | 0.00814        | 1.5707     | 0.29               |
| 21         | (M-H)-                   | Pantothenate             | 218.1035   | 0.00848        | 1.5172     | 1.81               |

**Table S2** Metabolites with significant differences between YBP500 and Model groups (*Continued*)

| <b>No.</b> | <b>Adduct</b>            | <b>Description</b>                                             | <b>m/z</b> | <b>p-value</b> | <b>VIP</b> | <b>Fold change</b> |
|------------|--------------------------|----------------------------------------------------------------|------------|----------------|------------|--------------------|
| 22         | (M-H)-                   | 2'-Deoxyuridine                                                | 227.0671   | 0.00105        | 2.7734     | 2.42               |
| 23         | (M+CH <sub>3</sub> COO)- | D-Mannose                                                      | 239.0774   | 0.01477        | 5.8732     | 0.54               |
| 24         | (M-H)-                   | Cytidine                                                       | 242.0780   | 0.03779        | 1.0261     | 1.64               |
| 25         | (M+H)+                   | Ile-Arg                                                        | 288.2020   | 0.01520        | 1.2924     | 0.57               |
| 26         | (M+NH <sub>4</sub> )+    | Linoleic acid                                                  | 298.2742   | 0.03319        | 2.0156     | 1.43               |
| 27         | (M-H)-                   | 12(R)-HETE                                                     | 319.2288   | 0.01011        | 22.6052    | 2.78               |
| 28         | (M+H)+                   | Erucamide                                                      | 338.3415   | 0.02378        | 2.9482     | 4.22               |
| 29         | (M+NH <sub>4</sub> )+    | (4Z,7Z,10Z,13Z,16Z,19Z)-4,7,10,13,16,19-Docosahexaenoic acid   | 346.2748   | 0.00011        | 6.4181     | 1.90               |
| 30         | (2M-H)-                  | D-Fructose                                                     | 359.1194   | 0.02795        | 4.6847     | 0.52               |
| 31         | (M-H)-                   | Sphingosine-1-phosphate                                        | 378.2411   | 0.00500        | 1.2704     | 1.69               |
| 32         | (M+H)+                   | L-Palmitoylcarnitine                                           | 400.3429   | 0.00437        | 2.4388     | 1.66               |
| 33         | (M+H)+                   | 1-Palmitoyl-2-hydroxy-sn-glycero-3-phosphoethanolamine         | 454.2948   | 0.00226        | 3.7479     | 2.31               |
| 34         | (M+Na-2H)-               | 1-Oleoyl-sn-glycerol 3-phosphate                               | 457.2355   | 0.00000        | 2.0786     | 4.15               |
| 35         | (M+H)+                   | 1-Myristoyl-sn-glycero-3-phosphocholine                        | 468.3099   | 0.02470        | 2.4038     | 1.57               |
| 36         | (M+H)+                   | 1-Palmitoyl-sn-glycero-3-phosphocholine                        | 496.3402   | 0.02518        | 1.1734     | 1.70               |
| 37         | (M+H-H <sub>2</sub> O)+  | 1-Stearoyl-sn-glycerol 3-phosphocholine                        | 506.3611   | 0.00001        | 2.0645     | 1.64               |
| 38         | (M+H)+                   | 1-Oleoyl-sn-glycero-3-phosphocholine                           | 522.3572   | 0.00003        | 13.3470    | 1.65               |
| 39         | (M+H)+                   | 1-Stearoyl-2-hydroxy-sn-glycero-3-phosphocholine               | 524.3744   | 0.00000        | 32.9755    | 1.56               |
| 40         | M+                       | 1-O-(cis-9-Octadecenyl)-2-O-acetyl-sn-glycero-3-phosphocholine | 550.3880   | 0.00058        | 2.6601     | 1.77               |
| 41         | (M-H+2Na)+               | 1,2-dioleoyl-sn-glycero-3-phosphatidylcholine                  | 830.5775   | 0.00802        | 5.1875     | 1.81               |
| 42         | (M-2H+3Na)+              | 1-Stearoyl-2-oleoyl-sn-glycerol 3-phosphocholine (SOPC)        | 854.5784   | 0.00646        | 2.6400     | 1.73               |

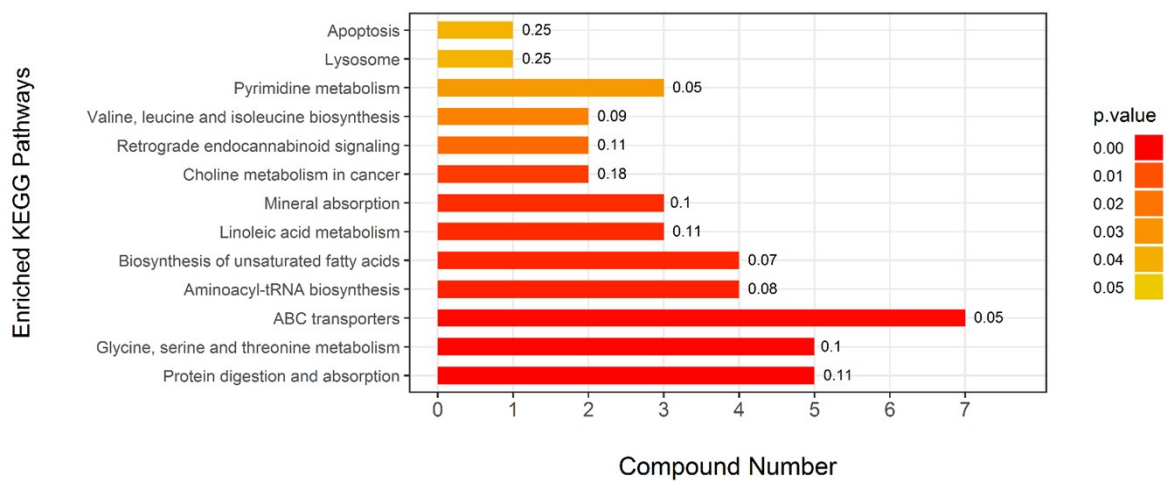

**Fig. S3** The enriched KEGG pathways of the metabolites between Sham and Model.
